# Supplementary material for: A Simple Pooling Method for Variable Selection in Multiply Imputed Datasets Outperformed Complex Methods
Source: Research Square preprint supplement (doi:10.21203/rs.3.rs-1322032/v1), 2022-02-17
Supplement: Supplementary file 1 [file 26cb4d67f4261b5b631d0395.docx]

Supplementary material

A simple pooling method for variable selection in Multiply Imputed datasets outperformed complex methods.

“The data that support the findings of this study are available from the web servers of the Amsterdam University Medical Center, but restrictions apply to the availability of these data, which were used under license for the current study, and so are not publicly available. Data are however available from the authors upon reasonable request and with permission of the Amsterdam University Medical center”.
